# Supplementary material
Source: PubMed Central journal article supplement (PMC6790140)
Supplement: EMS83210-supplement-1.pdf [file EMS83210-supplement-1.pdf]

## Supplement

### Supplementary Methods 1

#### Prospect valence learning (PVL) models

These models are both reported in Ahn et al<sup>1</sup>. We reproduce the description here and as such there may be inconsistencies across the text. Both models are identical with the exception of the learning rules. The utility of each trial (t) of each net outcome x(t) is calculated according to:

$$(1) \quad utility(t) = \begin{cases} x(t)^\alpha & \text{if } x(t) \geq 0 \\ -\lambda|x(t)|^\alpha & \text{if } x(t) < 0 \end{cases}$$

Where  $\alpha$  governs the shape of the utility function while  $\lambda$  determines the sensitivity to losses compared to gains.

Based on the outcome of the chosen option, the expectancies of the decks were computed using a learning rule. In the *igt\_pvl\_decay* model, the expectancies of all decks are discounted on each trial and then the expectancy of the chosen deck is updated by the current outcome utility:

$$(2) \quad E_j(t+1) = A \cdot E_j(t) + \delta_j(t) \cdot utility(t)$$

Where A determines how much the past expectancy is discounted and  $\delta_j(t)$  is a dummy variable which is 1 if deck j is chosen and 0 otherwise.

In the *igt\_pvl\_delta* model, the expectancy of only the selected deck is updated and the expectancies of the other decks remain unchanged:

$$(3) \quad E_j(t+1) = E_j(t) + W \cdot \delta_j(t) \cdot (utility(t) - E_j(t))$$

W determines how much weight is placed on past experiences of the chosen deck vs. the most recent selection from the deck. The probability of choosing each deck j is then determined by the softmax (where  $\theta$  sensitivity governs the degree of exploitation vs. exploration):

$$(4) \quad Pr[D(t+1) = j] = \frac{e^{\theta \cdot E_j(t+1)}}{\sum_{k=1}^4 e^{\theta \cdot E_k(t+1)}}$$

## **Supplementary Results 1**

Examining the individual parameters from the four prior model for the bandit4arm\_lapse model, we found a main effect of diagnosis only on the lapse and punishment learning rate parameters (Table 4 in main text) reiterating the same pattern seen in the winning two prior model. Of note, a similar pattern was seen on punishment learning rates in the model without the lapse parameter under threat (punishment learning rate under threat HDI 0.05-0.3; **Supplementary Table 2**); but, interestingly, not in the safe condition (HDI -0.19-0.27), although this model was not favoured in the model-comparison.

We also assessed whether the best patients and controls were better fit using a single or separate learning rates. We showed that in both groups, a model including two learning rates (bandit4arm\_lapse / bandit4arm\_lapse\_decay) was better than one with only a single learning rate (bandit4arm\_singleA\_lapse; **Supplementary Table 3**)

## Supplementary Results 2

### Post-hoc Analyses

#### *Possible confounds*

A post-hoc exploratory analysis in the symptomatic group alone revealed no significant effect of specific diagnosis (8 MDD, 8 GAD, 28 MDD/GAD) on the lapse (*lapse*  $F_{(2,41)}=0.54, p=0.59, \eta^2=0.026$ ; *lapse\_decay*  $F_{(2,41)}=0.60, p=0.55, \eta^2=0.029$ ), punishment learning rate (*lapse*  $F_{(2,41)}=0.50, p=0.61, \eta^2=0.024$ ; *lapse\_decay*  $F_{(2,41)}=0.56, p=0.58, \eta^2=0.027$ ), reward sensitivity (*lapse*  $F_{(2,41)}=0.048, p=0.95, \eta^2=0.002$ ; *lapse\_decay*  $F_{(2,41)}=0.32, p=0.73, \eta^2=0.015$ ), punishment sensitivity (*lapse*  $F_{(2,41)}=1.88, p=0.17, \eta^2=0.084$ ; *lapse\_decay*  $F_{(2,41)}=2.6, p=0.08, \eta^2=0.11$ ) or decay (*lapse\_decay*  $F_{(2,41)}=0.14, p=0.87, \eta^2=0.007$ ) parameters. Moreover, Bayesian ANOVA equivalents provided better model evidence for the null model over a model including diagnosis (*lapse*: *lapse*:  $BF_{10}=0.2$ ; punishment learning rate:  $BF_{10}=0.3$ ; reward sensitivity:  $BF_{10}=0.2$ ; punishment sensitivity:  $BF_{10}=0.6$ ; *lapse\_decay*: *lapse*:  $BF_{10}=0.3$ ; punishment learning rate:  $BF_{10}=0.3$ ; reward sensitivity:  $BF_{10}=0.2$ ; punishment sensitivity:  $BF_{10}=0.96$ ; decay:  $BF_{10}=0.2$ ).

In the patient group, symptoms did not correlate with IQ (BDI:  $r(41)=0.15, p=0.1$  [95%CI -0.05, 0.5]; trait anxiety:  $r(41)=0.27, p=0.36$  [95%CI -0.2, 0.5]) or age (BDI:  $r(41)=-0.062, p=0.7$  [95%CI -0.4, 0.3]; trait anxiety:  $r(41)=-0.15, p=0.3$  [95%CI -0.4, 0.2]). Moreover, IQ did not correlate with the lapse (*lapse*:  $r(41)=-0.09$  [95%CI -0.39, 0.22],  $\log BF_{10}=-1.5, p=0.59$ , *lapse\_decay*:  $r(41)=-0.03$  [95%CI -0.34, 0.28],  $\log BF_{10}=-1.6, p=0.85$ ), punishment learning rate (*lapse*:  $r(41)=-0.3$  [95%CI -0.56, 0.006],  $\log BF_{10}=0.15, p=0.055$ , *lapse\_decay*:  $r(41)=-0.23$  [95%CI -0.50, 0.09],  $\log BF_{10}=-0.64, p=0.15$ ) or decay (*lapse\_decay*:  $r(41)=-0.03$  [95%CI -0.34, 0.28],  $\log BF_{10}=-1.1, p=0.30$ ) parameters.

#### *Additional model independent analyses*

We analysed reaction time in a 2(Threat, Safe) x 2(Post Stay, Post Switch) x 2(asymptomatic, symptomatic) repeated measures ANOVA. There was a main effect of diagnosis ( $F(1,130)=12, p<0.001, \eta^2=0.08$ ), because patients were slower overall, and a main effect of preceding trial ( $F(1,130)=19, p<0.001, \eta^2=0.12$ ), as all participants were slower following a switch trial, but no other main effects or interactions (all  $ps>0.4$ ).

We also analysed total amount won and lost across conditions and groups in a 2(Threat, Safe) x 2(Wins, Losses) x 2(asymptomatic, symptomatic) repeated measures ANOVA. There was no main effect of diagnosis ( $F(1,130)=0.8, p=0.36, \eta^2=0.006$ ), interaction between diagnosis and valence ( $F(1,130)=0.014, p=0.91, \eta^2<0.001$ ), or any other interaction (all  $ps>0.5$ ).

**Supplementary Table 1: All Bayes Factors from the Bayesian repeated measures ANOVA in the ‘model agnostic task analysis’:**

**Model Comparison**

| Models                                                                                                                                | P(M)  | P(M data)      | Log(BF <sub>M</sub> ) | Log(BF <sub>10</sub> ) | error % |
|---------------------------------------------------------------------------------------------------------------------------------------|-------|----------------|-----------------------|------------------------|---------|
| Null model (incl. subject)                                                                                                            | 0.053 | 1.561e -<br>40 | -88.768               | 0.000                  |         |
| Condition                                                                                                                             | 0.053 | 1.700e -<br>41 | -90.985               | -2.217                 | 1.135   |
| Outcome                                                                                                                               | 0.053 | 0.764          | 4.063                 | 91.388                 | 1.763   |
| Condition + Outcome                                                                                                                   | 0.053 | 0.097          | 0.660                 | 89.326                 | 7.225   |
| Condition + Outcome + Condition * Outcome                                                                                             | 0.053 | 0.014          | -1.398                | 87.356                 | 2.306   |
| Diagnosis                                                                                                                             | 0.053 | 1.796e -<br>41 | -90.930               | -2.162                 | 1.097   |
| Condition + Diagnosis                                                                                                                 | 0.053 | 2.041e -<br>42 | -93.105               | -4.337                 | 2.549   |
| Outcome + Diagnosis                                                                                                                   | 0.053 | 0.092          | 0.605                 | 89.276                 | 2.658   |
| Condition + Outcome + Diagnosis                                                                                                       | 0.053 | 0.010          | -1.675                | 87.083                 | 1.654   |
| Condition + Outcome + Condition * Outcome + Diagnosis                                                                                 | 0.053 | 0.002          | -3.511                | 85.255                 | 3.574   |
| Condition + Diagnosis + Condition * Diagnosis                                                                                         | 0.053 | 3.293e -<br>43 | -94.929               | -6.161                 | 2.451   |
| Condition + Outcome + Diagnosis + Condition * Diagnosis                                                                               | 0.053 | 0.002          | -3.308                | 85.458                 | 5.230   |
| Condition + Outcome + Condition * Outcome + Diagnosis + Condition * Diagnosis                                                         | 0.053 | 3.123e -4      | -5.181                | 83.587                 | 5.823   |
| Outcome + Diagnosis + Outcome * Diagnosis                                                                                             | 0.053 | 0.016          | -1.260                | 87.492                 | 2.117   |
| Condition + Outcome + Diagnosis + Outcome * Diagnosis                                                                                 | 0.053 | 0.003          | -2.904                | 85.861                 | 40.280  |
| Condition + Outcome + Condition * Outcome + Diagnosis + Outcome * Diagnosis                                                           | 0.053 | 2.788e -4      | -5.294                | 83.473                 | 4.514   |
| Condition + Outcome + Diagnosis + Condition * Diagnosis + Outcome * Diagnosis                                                         | 0.053 | 3.241e -4      | -5.144                | 83.624                 | 3.106   |
| Condition + Outcome + Condition * Outcome + Diagnosis + Condition * Diagnosis + Outcome * Diagnosis                                   | 0.053 | 5.157e -5      | -6.982                | 81.786                 | 5.252   |
| Condition + Outcome + Condition * Outcome + Diagnosis + Condition * Diagnosis + Outcome * Diagnosis + Condition * Outcome * Diagnosis | 0.053 | 1.392e -5      | -8.291                | 80.476                 | 2.912   |

**Supplementary Table 2: Group and condition effects on the full bandit4arm\_lapse model**  
 Values represent 95% highest density intervals (HDI) lower bound and upper bound). If the HDI does not encompass zero, we consider there to be a meaningful difference between the groups/conditions. We find a main effect of group on the punishment learning rate and lapse parameters (in bold).

|                                 | Symptomatic – Control |             |             |             | Threat - safe |      |         |      |
|---------------------------------|-----------------------|-------------|-------------|-------------|---------------|------|---------|------|
|                                 | Threat                |             | Safe        |             | Anxious       |      | Healthy |      |
| <b>Reward Sensitivity</b>       | -5.71                 | 1.63        | -1.31       | 10.69       | -12.00        | 0.76 | -2.33   | 3.57 |
| <b>Punishment Sensitivity</b>   | -4.83                 | 6.72        | -4.48       | 21.52       | -21.51        | 7.40 | -1.80   | 3.32 |
| <b>Reward Learning Rate</b>     | -0.13                 | 0.25        | -0.14       | 0.26        | -0.27         | 0.28 | -0.07   | 0.11 |
| <b>Punishment Learning Rate</b> | <b>0.11</b>           | <b>0.45</b> | <b>0.08</b> | <b>0.55</b> | -0.30         | 0.25 | -0.08   | 0.10 |
| <b>Lapse</b>                    | <b>0.01</b>           | <b>0.23</b> | <b>0.12</b> | <b>0.34</b> | -0.25         | 0.02 | -0.07   | 0.08 |

**Supplementary Table 3: Comparing learning rate models across groups.** We demonstrate that both groups are better fit (lower leave one out information criterion (LOOIC) in bold) by a model including two learning rates and a decay parameter. In other words, group differences are not driven by the different groups using different models.

|                                 | <b>LOOIC Anxious</b> | <b>LOOC Healthy</b> |
|---------------------------------|----------------------|---------------------|
| <i>bandit4arm_lapse</i>         | 44446                | 83771               |
| <i>bandit4arm_singleA_lapse</i> | 44679                | 84442               |
| <i>bandit4arm_lapse_decay</i>   | <b>44097</b>         | <b>81997</b>        |

## Supplementary References

- 1 Ahn, W.-Y. *et al.* Decision-making in stimulant and opiate addicts in protracted abstinence: evidence from computational modeling with pure users. *Frontiers in psychology* **5**, 849 (2014).
